# Supplementary material for: A novel g-C3N4 based photocathode for photoelectrochemical hydrogen evolution
Source: Royal Society of Chemistry journal article supplement (doi:10.1039/c5ra23265a), 2016-01-01
Supplement: c5ra23265a1.pdf [file c5ra23265a1.pdf]

**Electronic Supplementary Information:**

**A Novel g-C<sub>3</sub>N<sub>4</sub> Based Photocathode for  
Photoelectrochemical Hydrogen Evolution**

Yuming Dong\*, Yanmei Chen, Pingping Jiang, Guangli Wang, Xiuming Wu and  
Ruixian Wu

Key Laboratory of Food Colloids and Biotechnology (Ministry of Education of  
China), School of Chemical and Material Engineering, Jiangnan University, Wuxi  
214122, P. R. China.

\* Corresponding authors. Fax: +86 510 85917763. E-mail address:  
dongym@jiangnan.edu.cn (Y. Dong).

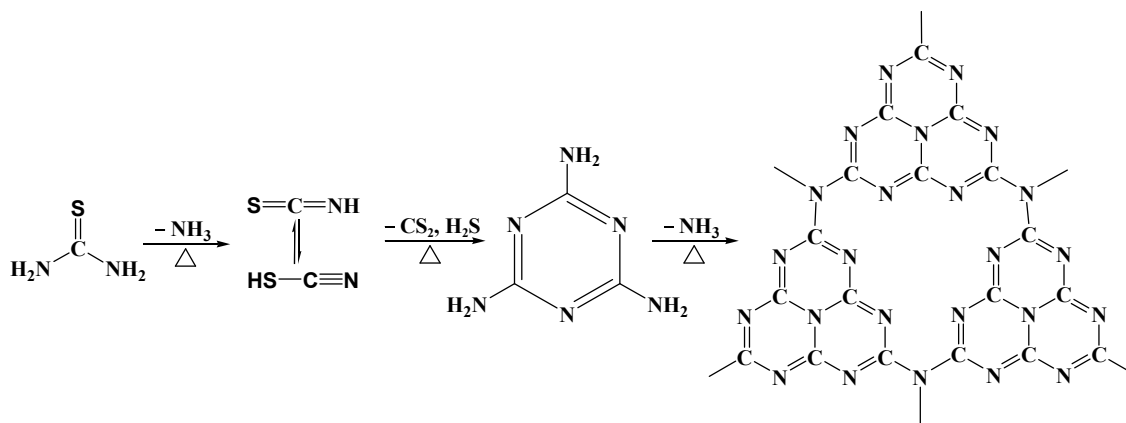

**Scheme S1** The polycondensation of thiourea into a graphitic carbon nitride network at high temperatures.

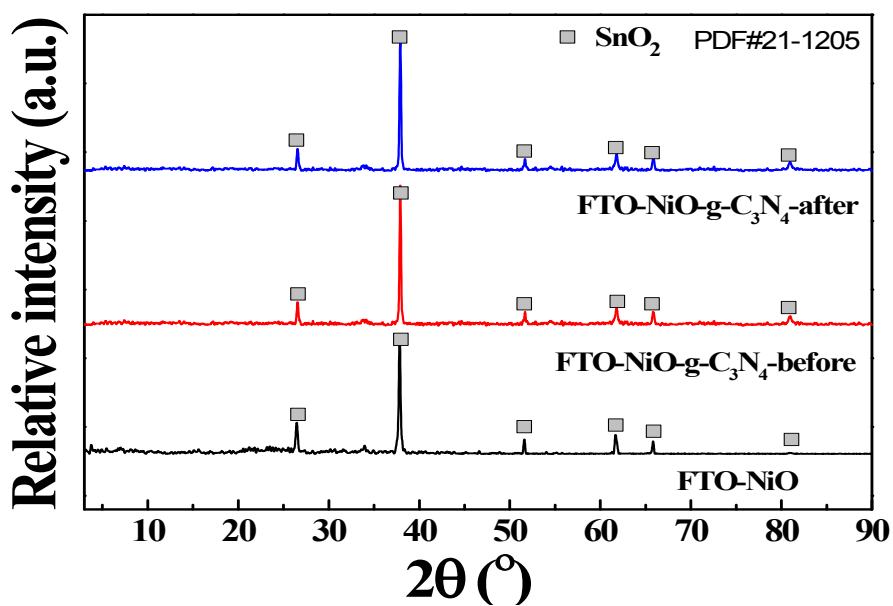

**Figure S1** XRD patterns of the NiO/FTO, g-C<sub>3</sub>N<sub>4</sub>/NiO/FTO before and after the reaction.

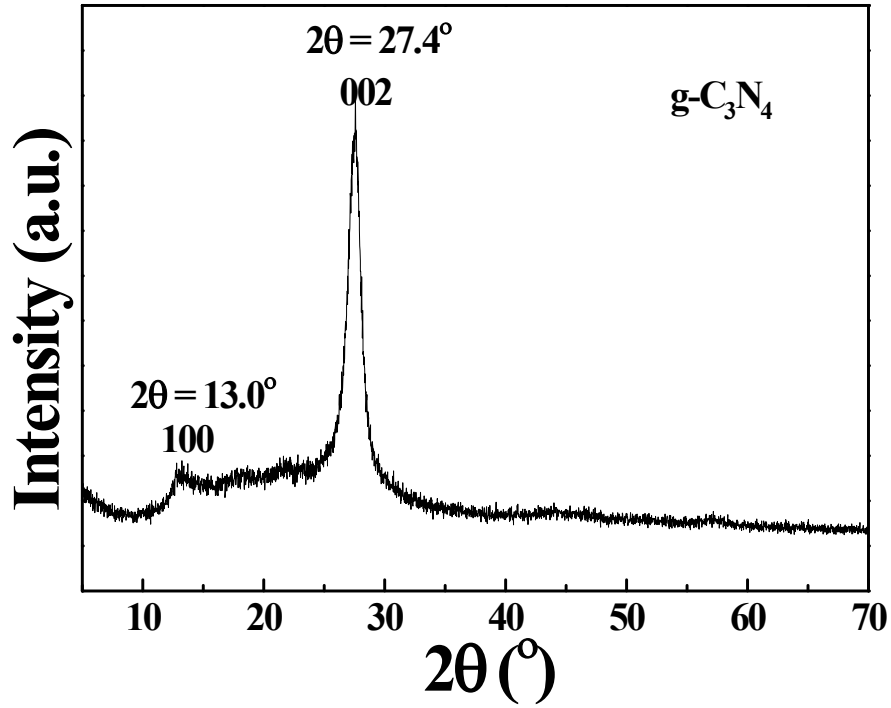

Figure S2 XRD patterns of pure g-C<sub>3</sub>N<sub>4</sub>.

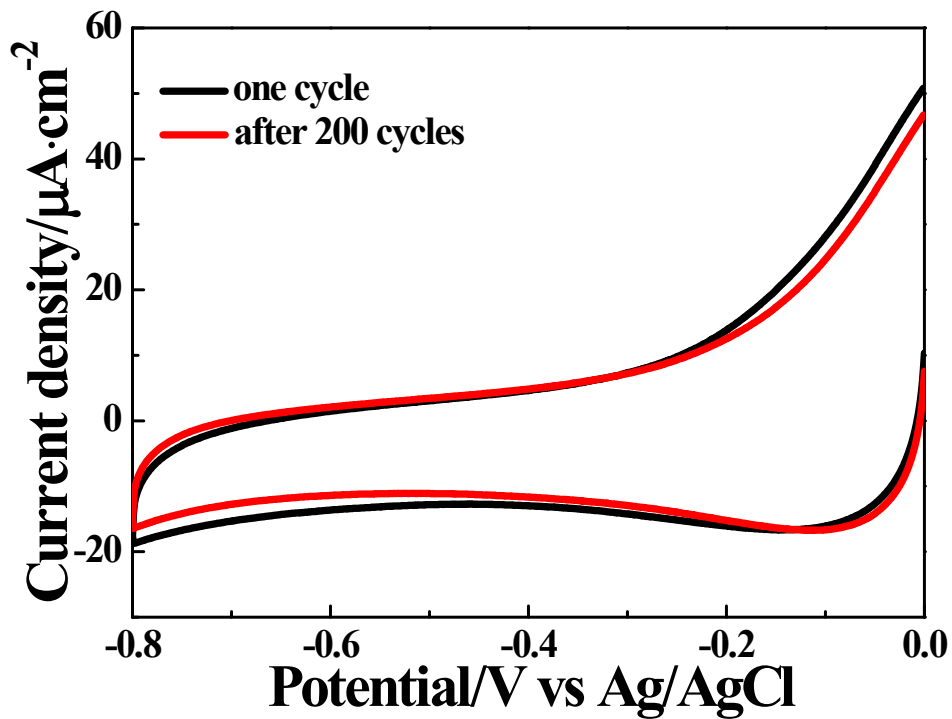

Figure S3 Cyclic voltammety of g-C<sub>3</sub>N<sub>4</sub>/NiO/FTO electrode in N<sub>2</sub> saturated Na<sub>2</sub>SO<sub>4</sub> solution (0.1M). The spectra were collected by scanning from 0 to -0.8 V vs Ag/AgCl with scan speed of 0.1Vs<sup>-1</sup>.

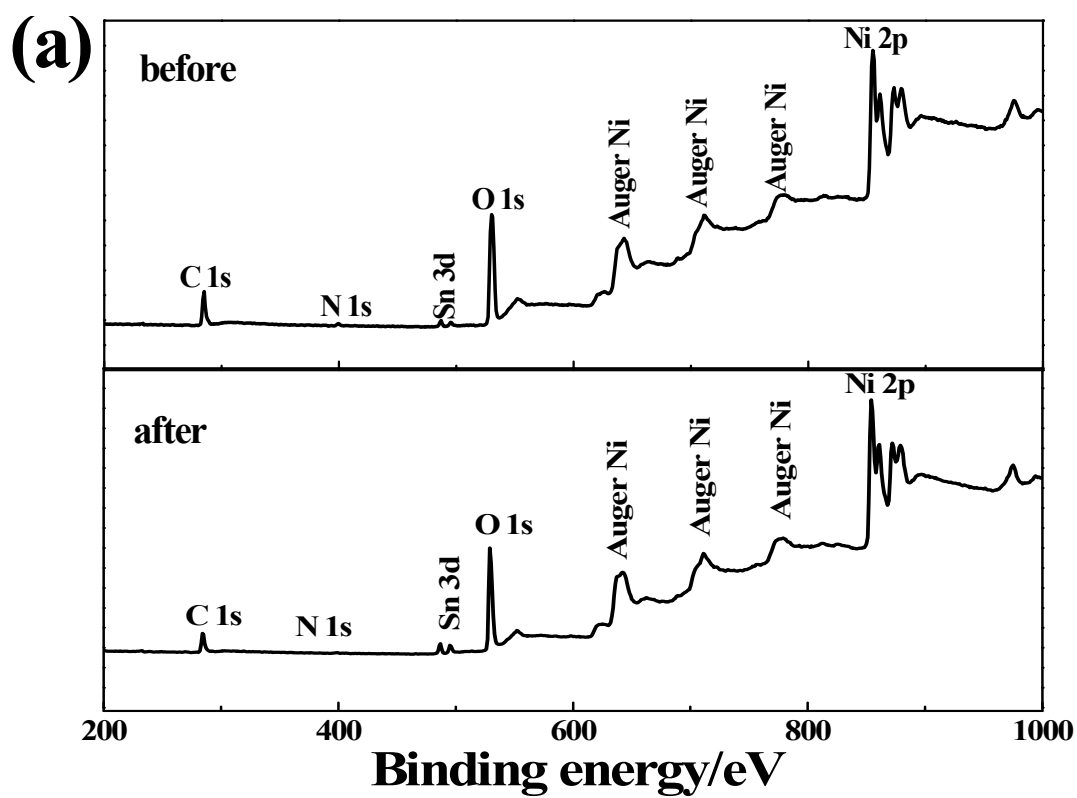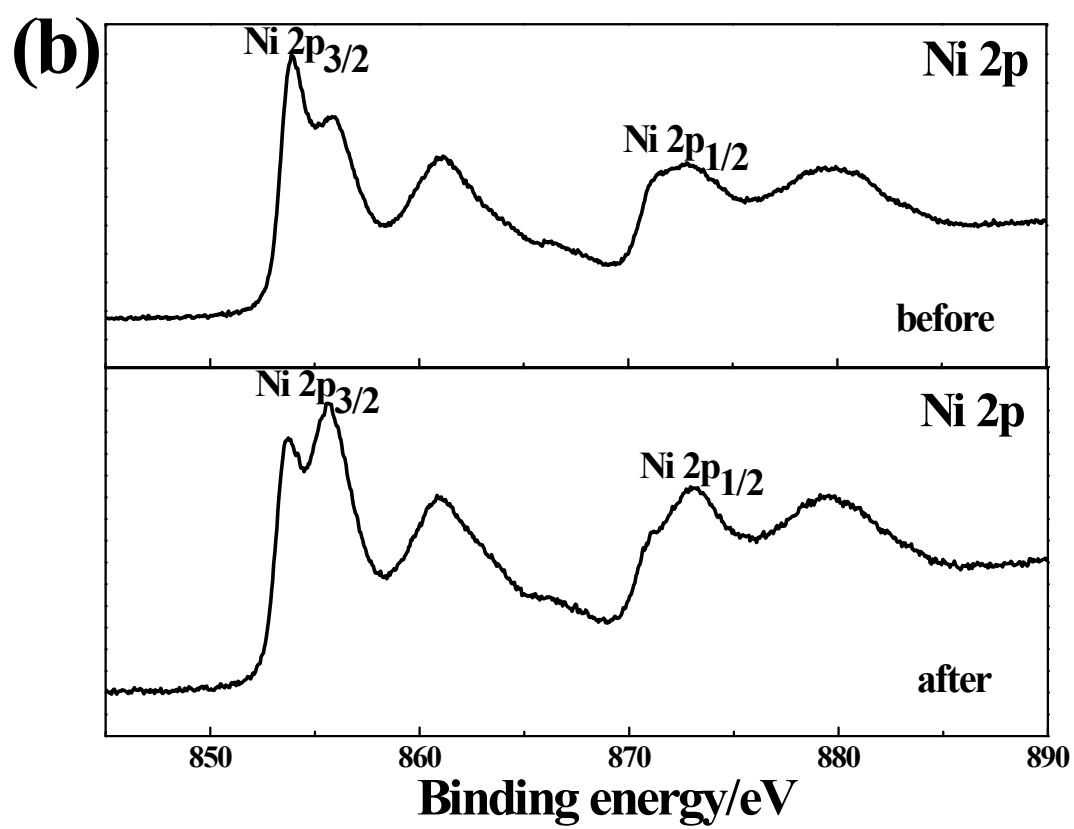

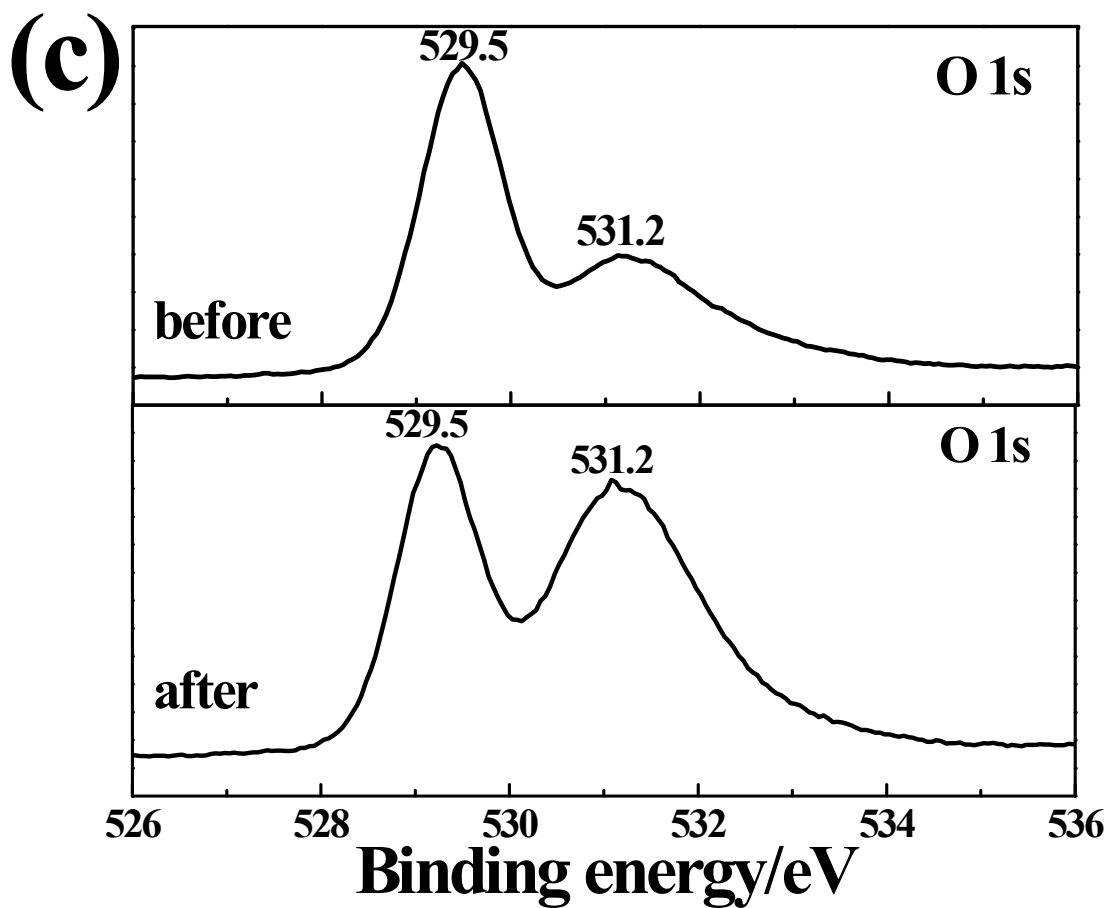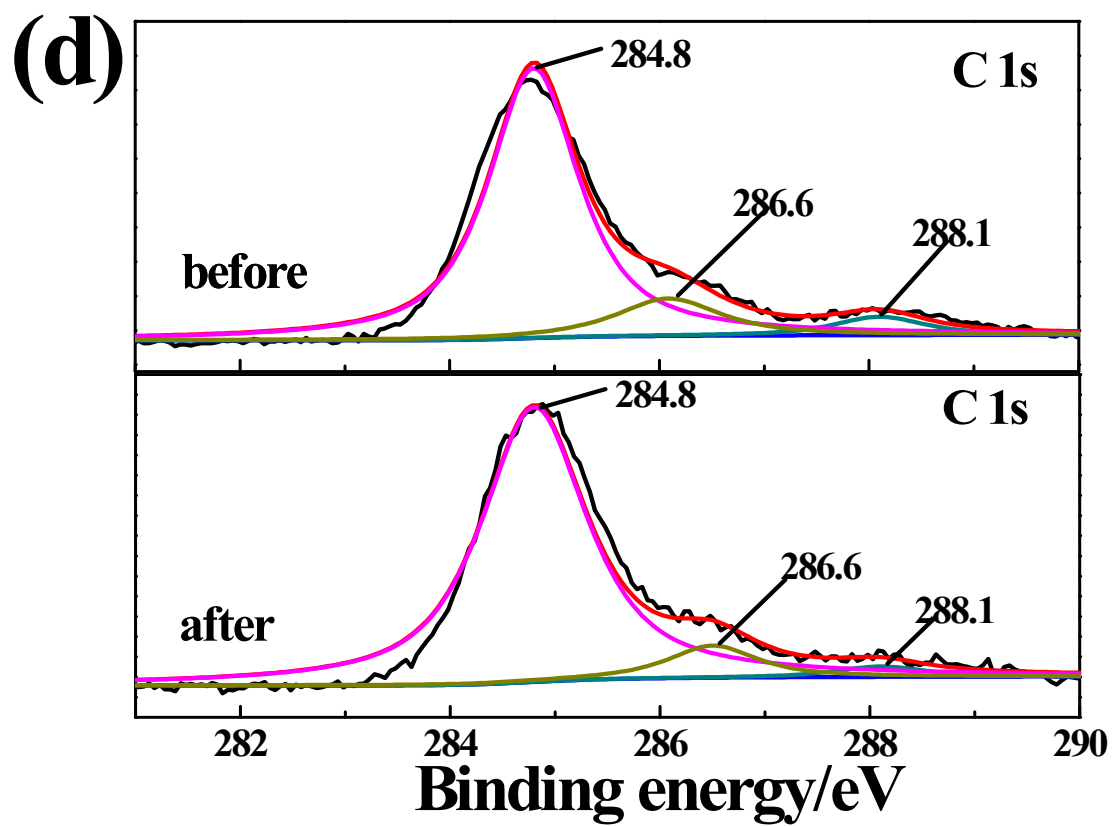

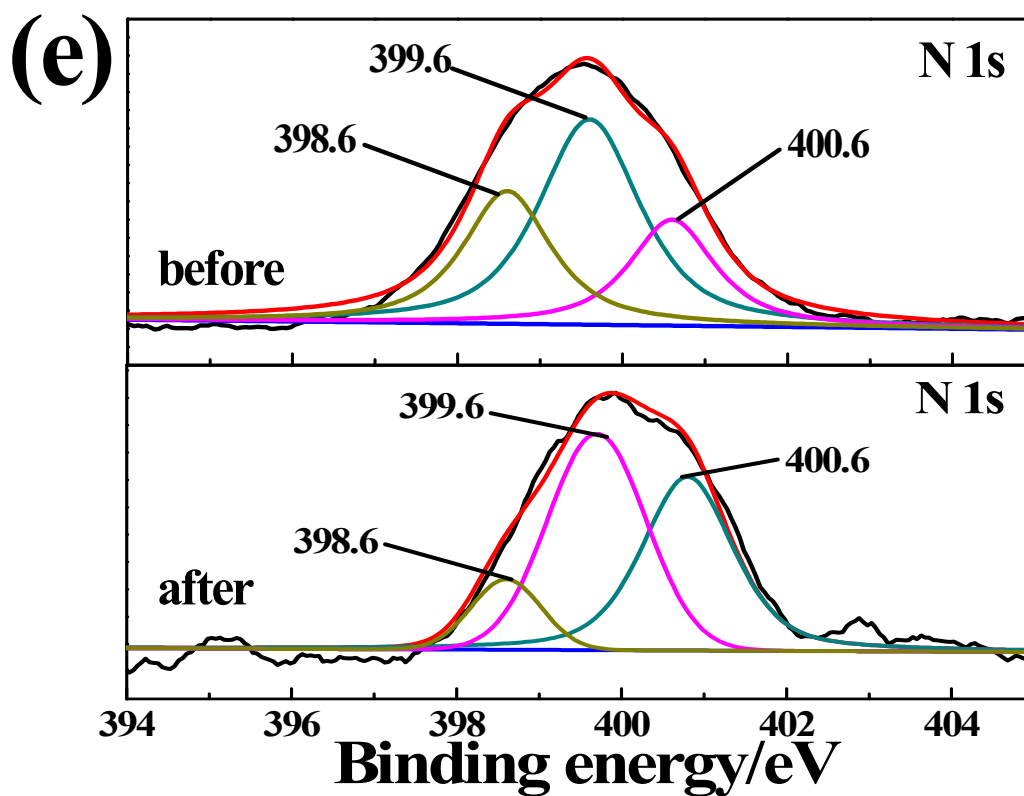

Figure S4 (a) Survey scan XPS spectra in the binding energy range 200-1000 eV and high-resolution spectra, (b) Ni2p, (c) O1s, (d) C1s and (e)N1s of g-C<sub>3</sub>N<sub>4</sub>/NiO before and after reaction.

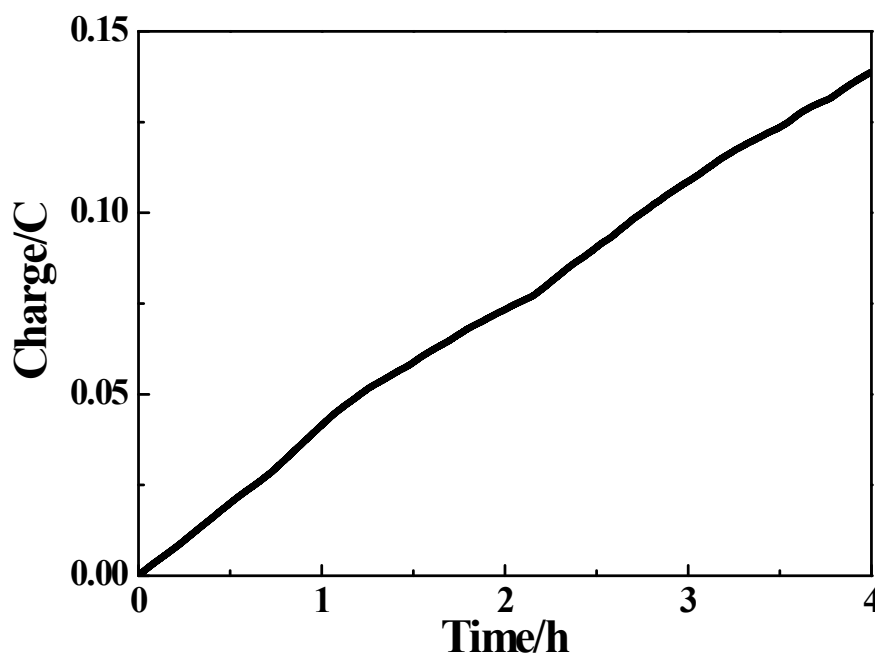

Figure S5 PEC hydrogen production over g-C<sub>3</sub>N<sub>4</sub>/NiO photocathode during 4 h under sunlight irradiation in Wuxi city on Dec. 26, 2016. Outdoor temperature: 4–14 °C, time: 10:15–14:15.

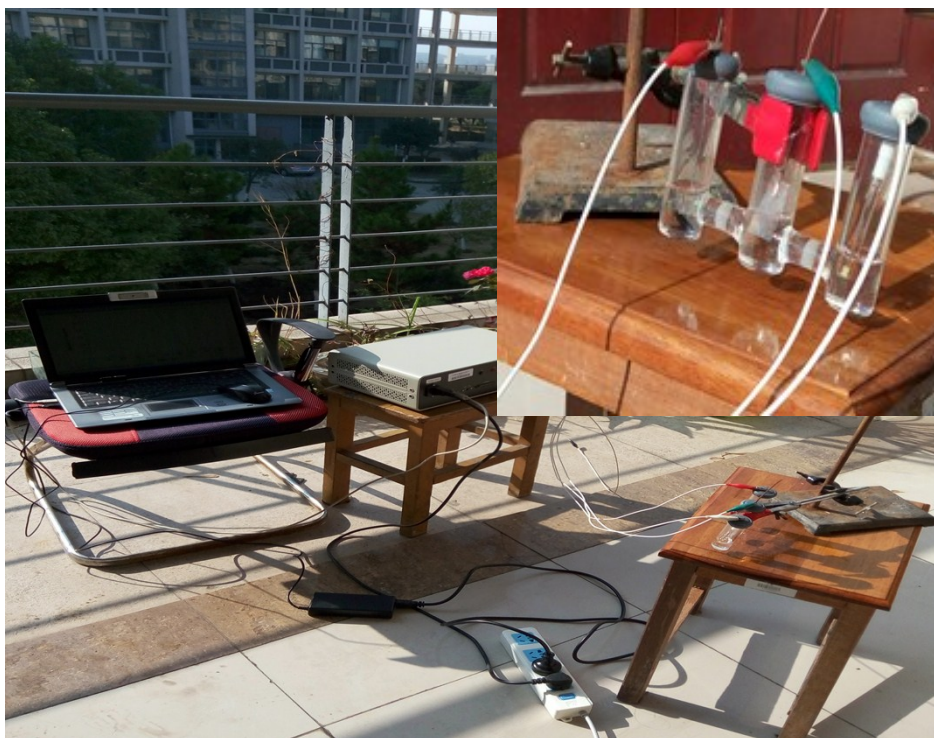

**Figure S6** The photo of outdoor equipment of sunlight-driven PEC hydrogen production over g- $C_3N_4/NiO$  photocathode during 4 h under sunlight irradiation in Wuxi city on Dec. 26, 2016. Outdoor temperature: 4–14 oC, time: 10:15–14:15.
